# Supplementary material for: Role of Regulatory T Cell and Effector T Cell Exhaustion in Liver-Mediated Transgene Tolerance in Muscle
Source: PubMed Central journal article supplement — Mol Ther Methods Clin Dev. 2019 Sep 3;15:83–100. doi: 10.1016/j.omtm.2019.08.012 (PMC6804827; doi:10.1016/j.omtm.2019.08.012), 2019-09-03
Supplement: mmc1.pdf [file mmc1.pdf]

**OMTM, Volume 15**

## **Supplemental Information**

### **Role of Regulatory T Cell and Effector**

#### **T Cell Exhaustion in Liver-Mediated**

#### **Transgene Tolerance in Muscle**

**Jérôme Poupot, Helena Costa Verdera, Romain Hardet, Pasqualina Colella, Fanny Collaud, Laurent Bartolo, Jean Davoust, Peggy Sanatine, Federico Mingozi, Isabelle Richard, and Giuseppe Ronzitti**

## Supplementary Material

**Supplementary Table 1. Inflammatory markers expressed in liver of mice treated as described in Figure 2**

|               | CTRL          | IM                    | IM/IV D0           | IM/IV D15            |
|---------------|---------------|-----------------------|--------------------|----------------------|
| <b>CD4</b>    | 49.13 ± 11.91 | <b>135.73 ± 19.72</b> | 36.61 ± 3.63       | 42.77 ± 14.01        |
| <b>CD8</b>    | 3.45 ± 1.35   | 2.55 ± 0.59           | 15.17 ± 5.31       | <b>26.36 ± 18.11</b> |
| <b>FOX-P3</b> | 0.08 ± 0.09   | 0.06 ± 0.02           | 0.34 ± 0.13        | <b>0.69 ± 0.38</b>   |
| <b>LAG3</b>   | 1.73 ± 0.92   | 1.87 ± 0.70           | 2.63 ± 0.85        | 4.95 ± 3.14          |
| <b>IFNg</b>   | 0.78 ± 0.16   | 0.43 ± 0.12           | 1.31 ± 0.46        | <b>2.00 ± 0.64</b>   |
| <b>PD-1</b>   | 0.23 ± 0.15   | 0.15 ± 0.04           | 2.84 ± 0.93        | <b>6.84 ± 5.14</b>   |
| <b>PD-L1</b>  | 3.40 ± 0.34   | 1.84 ± 0.32           | <b>6.15 ± 1.20</b> | <b>10.45 ± 2.57</b>  |
| <b>PD-L2</b>  | 0.04 ± 0.02   | 0.33 ± 0.62           | 0.08 ± 0.02        | 0.20 ± 0.06          |
| <b>TIM3</b>   | 0.94 ± 0.48   | 0.51 ± 0.02           | 1.49 ± 0.56        | 3.05 ± 0.90          |
| <b>CTLA-4</b> | 1.43 ± 1.87   | 0.44 ± 0.39           | 0.16 ± 0.07        | 0.49 ± 0.22          |
| <b>2B4</b>    | 0.34 ± 0.17   | 0.15 ± 0.06           | 0.47 ± 0.17        | 0.77 ± 0.12          |

Abundance values ( $2^{-\Delta\text{Ct}} \times 10^{-4}$ ) were expressed as mean ± standard deviation. Values in red are significantly different from control Group.

**Supplementary Table 2. Inflammatory markers expressed in muscle of mice treated as described in Figure 4**

|               | CTRL            | Muscle          | Liver           | Muscle-Liver    |
|---------------|-----------------|-----------------|-----------------|-----------------|
| <b>CD4</b>    | 0.65 ± 0.15     | 12.95 ± 5.02    | 0.90 ± 0.24     | 4.68 ± 0.58     |
| <b>FOXP3</b>  | 1.15 ± 0.18     | 4.83 ± 2.39     | 1.21 ± 0.10     | 2.41 ± 0.50     |
| <b>IL10</b>   | 0.02 ± 0.01     | 0.95 ± 0.49     | 0.05 ± 0.02     | 0.50 ± 0.33     |
| <b>IL35</b>   | 0.29 ± 0.07     | 0.10 ± 0.01     | 0.53 ± 0.24     | 0.28 ± 0.04     |
| <b>GITR</b>   | 0.20 ± 0.05     | 9.39 ± 5.43     | 0.30 ± 0.06     | 3.71 ± 1.48     |
| <b>CTLA-4</b> | 0.0013 ± 0.0005 | 0.1358 ± 0.1488 | 0.0021 ± 0.0012 | 0.0934 ± 0.0770 |
| <b>AREG</b>   | 0.0005 ± 0.0001 | 0.0011 ± 0.0007 | 0.0004 ± 0.0000 | 0.0178 ± 0.0072 |

Abundance values ( $2^{-\Delta\text{Ct}} \times 10^{-3}$ ) were expressed as mean ± standard deviation. Values in red are significantly different from control Group.

**Supplementary Table 3. Total or Dextramer+ CD8+, CD8+ PD1+, CD8+ PD1+ LAG3+ and CD8+ PD1+ TIM3+ cells measured in liver non-parenchymal cells of mice from the indicated groups.**

| Group        | CD8+        |            | CD8+ PD1+ |            | CD8+ PD1+ LAG3+ |            | CD8+ PD1+ TIM3+ |            |
|--------------|-------------|------------|-----------|------------|-----------------|------------|-----------------|------------|
|              | Total       | Dextramer+ | Total     | Dextramer+ | Total           | Dextramer+ | Total           | Dextramer+ |
| Control      | 2389 ± 560  | 44 ± 3     | 13 ± 10   | 5 ± 3      | 1 ± 1           | 0 ± 0      | 0 ± 1           | 0 ± 0      |
| Muscle       | 3178 ± 1969 | 527 ± 235  | 31 ± 16   | 26 ± 13    | 2 ± 2           | 0 ± 0      | 1 ± 1           | 0 ± 0      |
| Liver        | 3538 ± 346  | 46 ± 14    | 32 ± 11   | 6 ± 5      | 20 ± 6          | 2 ± 2      | 17 ± 3          | 1 ± 1      |
| Muscle-Liver | 2860 ± 342  | 40 ± 6     | 56 ± 28   | 9 ± 4      | 36 ± 22         | 3 ± 3      | 30 ± 17         | 2 ± 1      |

Absolute counts were reported as mean±standard deviation.

## Supplementary FIGURE 1

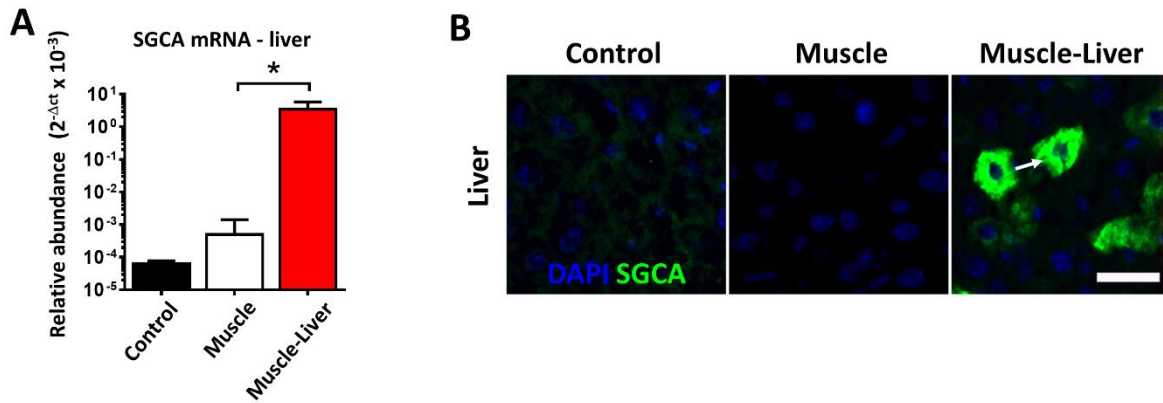

**Supplementary Figure 1.** (A) hSGCA mRNA measured in liver. (B) anti-hSGCA (green), and DAPI (blue) immunostaining performed in liver of mice treated as described in Figure 1 (Scale bar = 25 $\mu$ m). White arrow indicates SGCA-expressing hepatocyte. Data were expressed as mean  $\pm$  SD. Statistical analysis was performed by t-test (\* =  $p < 0.05$ , as indicated,  $n = 4$  per group).

## Supplementary FIGURE 2

**A**

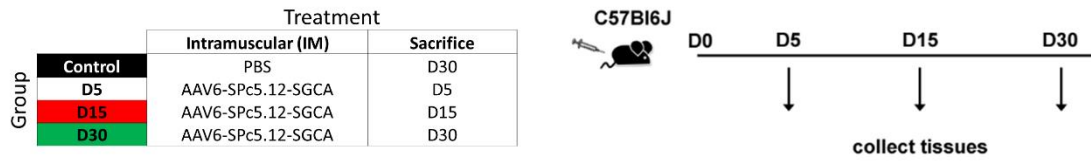

**B**

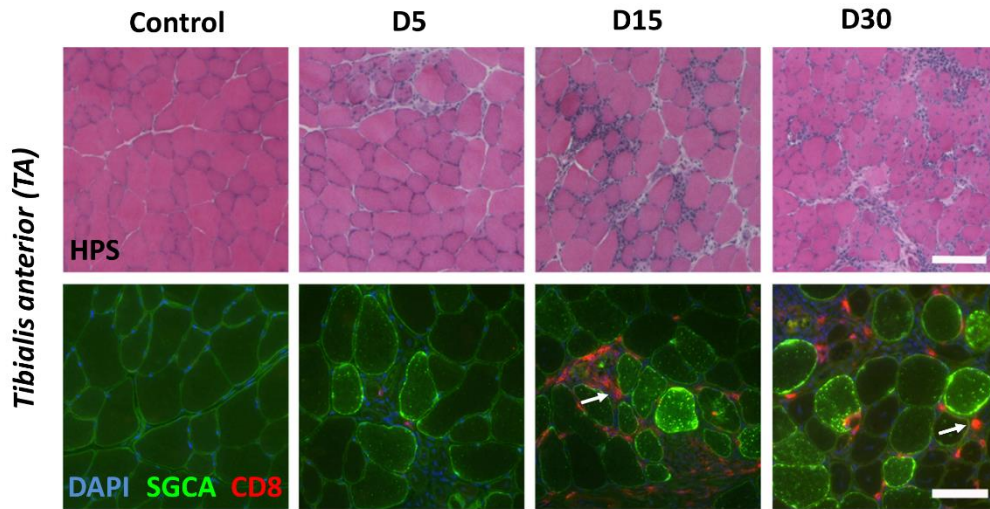

**C**

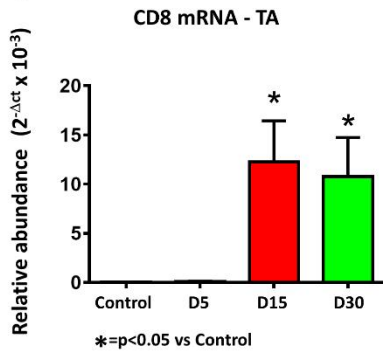

**D**

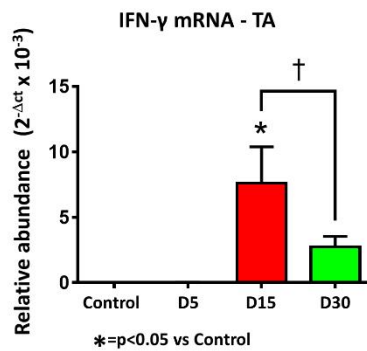

**E**

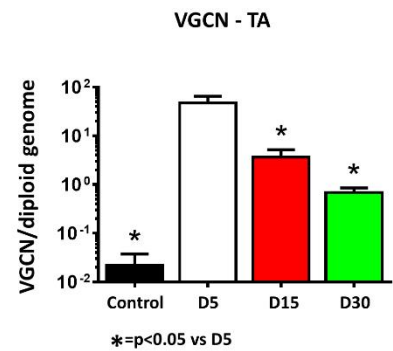

**F**

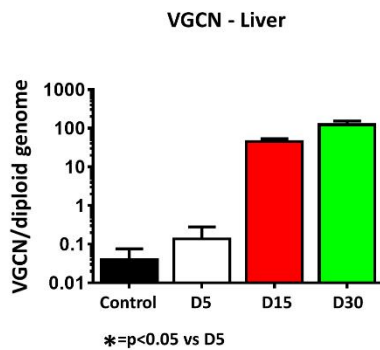

**Supplementary Figure 2.** (A) Eight-week old C57BL/6J mice received at day 0 an intramuscular injection (IM, *Tibialis Anterior*, TA) of  $2.5 \times 10^9$  vg/mouse of AAV6-SPc5.12-

hSGCA vector. Mice were sacrificed and tissues collected at day 0 (D0), day 5 (D5) and day 30 (D30) after vector injection. PBS-injected mice sacrificed 30 days after vector injection were used as controls (Control). **(B)** Hematoxylin phloxine saffron staining (HPS, upper panel, scale bar = 100 $\mu$ m) and anti-hSGCA (green), CD8 (red) and DAPI (blue) immunostaining (lower panel, scale bar = 20 $\mu$ m) performed in TA. White arrows indicate CD8 cells. **(C, D)** CD8 and IFN $\gamma$  mRNA measured in TA. **(E)** Vector genome copy number (VGCN) per diploid genome measured in TA. **(F)** Vector genome copy number (VGCN) per diploid genome measured in liver. Data were expressed as mean  $\pm$  SD. Statistical analyses were performed by ANOVA (\* =  $p < 0.05$ , † =  $p < 0.05$  as indicated, n=4 per group).

### Supplementary FIGURE 3

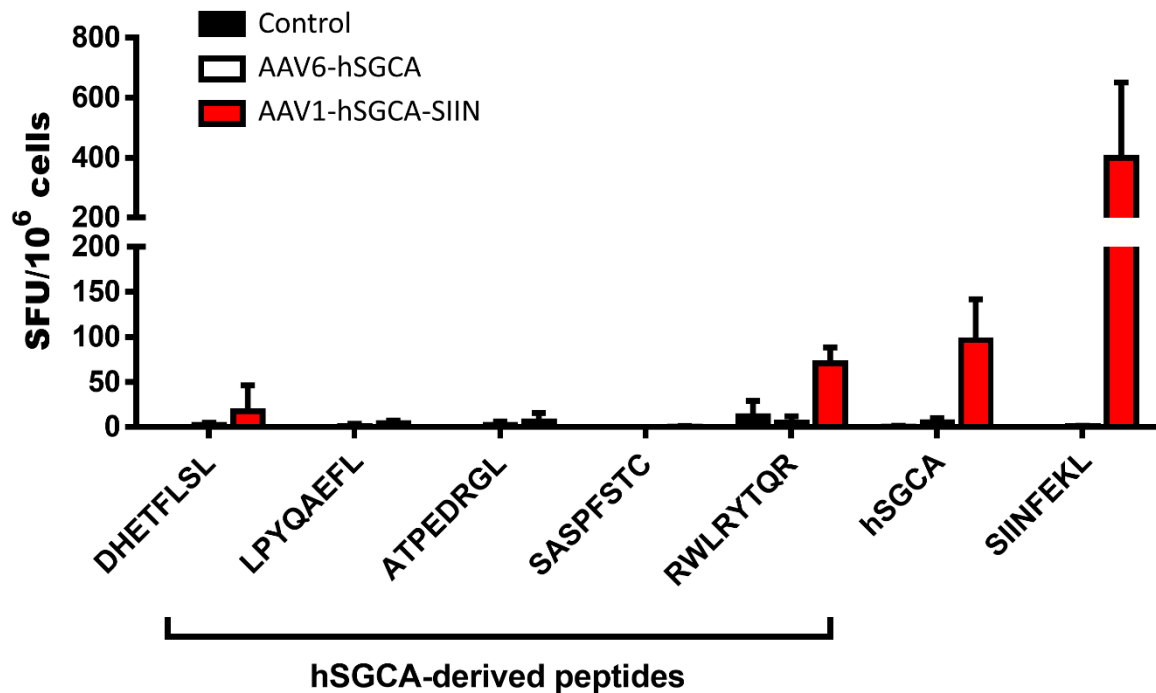

**Supplementary Figure 3.** Identification of peptide epitopes binding to class I murine MHC in hSGCA protein. Epitopes of hSGCA with the highest probability of presentation by H-2Kb MHC class I molecules were identified by Immune Epitope Database ([www.iedb.org](http://www.iedb.org)). Five peptides with the highest score were synthesized by GeneCust and used to stimulate splenocytes obtained from C57BL/6J mice intramuscularly injected with PBS (Control), AAV6 expressing hSGCA under the control of SPc5.12 promoter (AAV6-hSGCA) or AAV1 expressing hSGCA-SIINFEKL transgene under the control of SPc5.12 promoter (AAV1-hSGCA-SIIN). Splenocytes were stimulated in parallel with hSGCA recombinant protein or with the SIINFEKL peptide. Data were expressed as mean  $\pm$  SD.



## Supplementary FIGURE 4

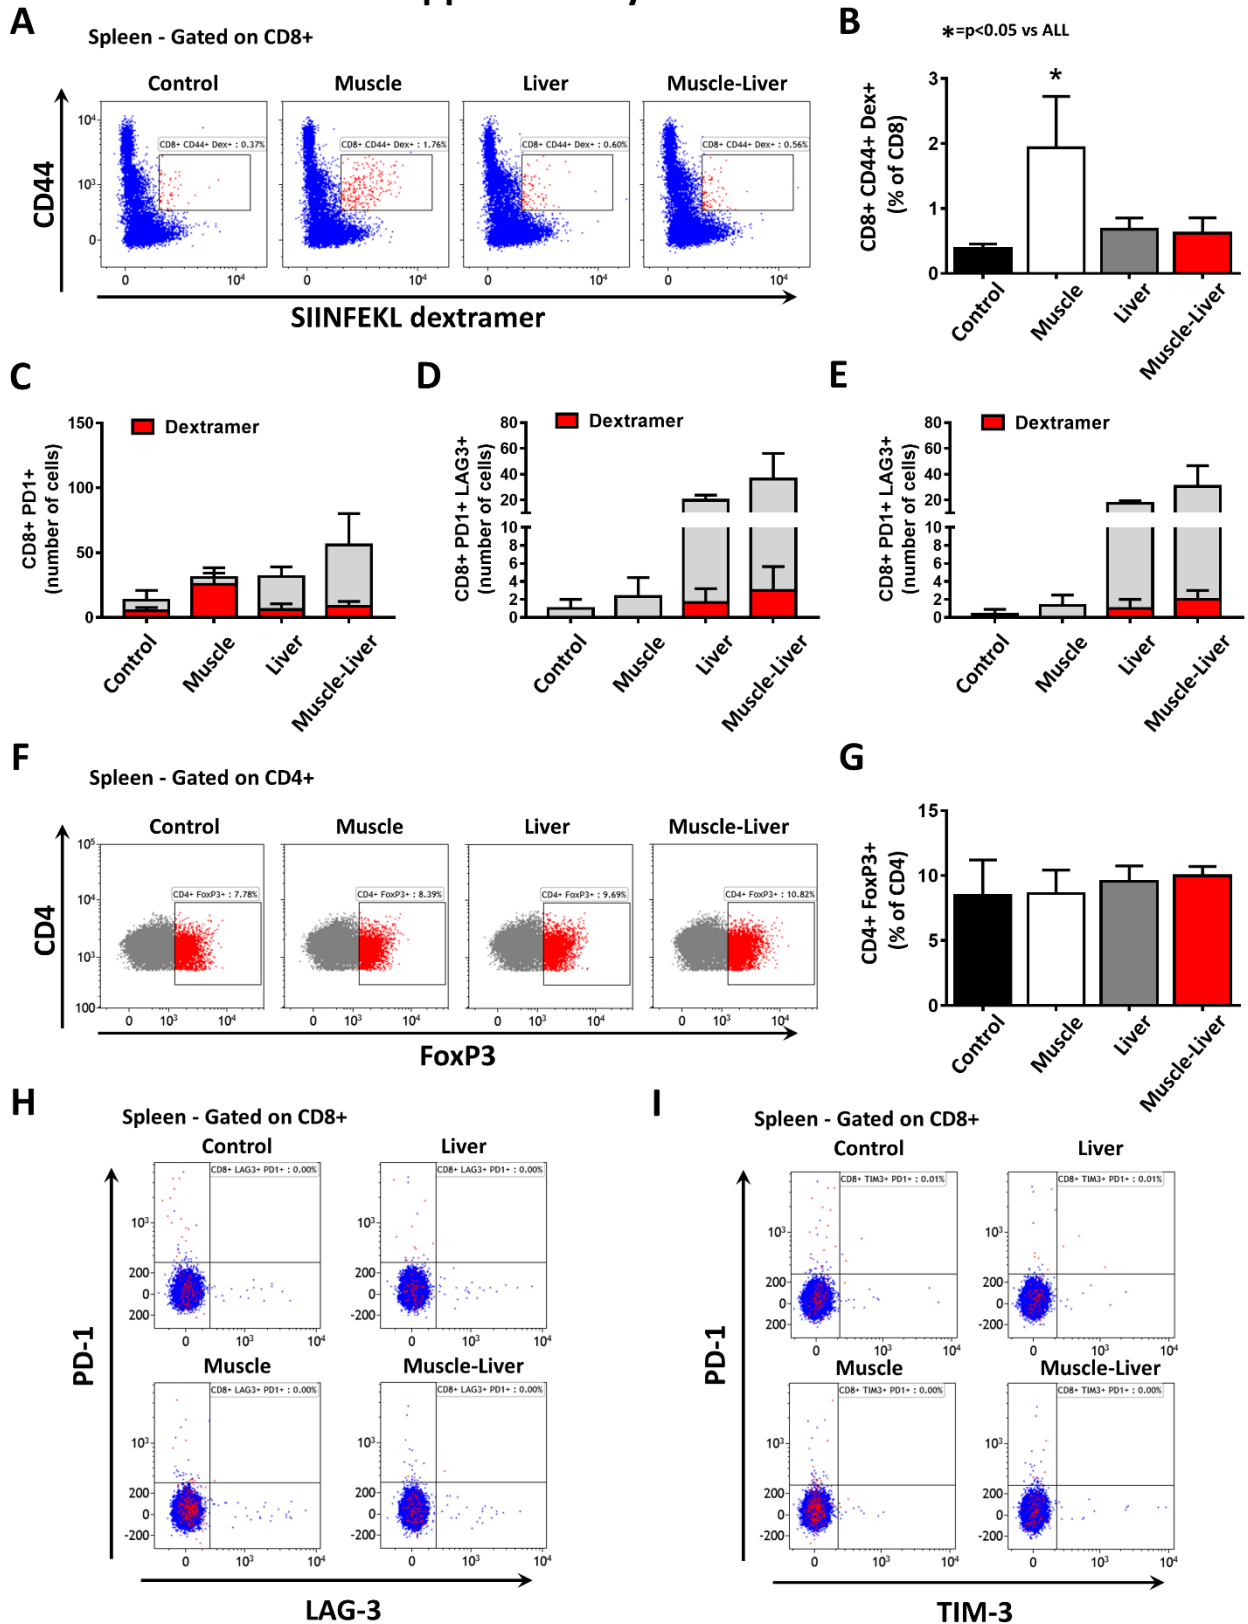

Supplementary Figure 4. (A,B) Flow cytometry dot plots representing CD8+CD44+Dextramer+ cells gated on CD8+ cells in splenocytes. The histogram shows the

quantification of the dot plots. **(C)** Absolute counts of CD8<sup>+</sup> PD1<sup>+</sup> cells (in gray) and CD8<sup>+</sup> PD1<sup>+</sup> DEX<sup>+</sup> (in red) measured in liver. **(D)** Absolute counts of CD8<sup>+</sup> PD1<sup>+</sup> LAG3<sup>+</sup> cells (in gray) and CD8<sup>+</sup> PD1<sup>+</sup> LAG3<sup>+</sup> DEX<sup>+</sup> (in red) measured in liver. **(E)** Absolute counts of CD8<sup>+</sup> PD1<sup>+</sup> TIM3<sup>+</sup> cells (in gray) and CD8<sup>+</sup> PD1<sup>+</sup> TIM3<sup>+</sup> DEX<sup>+</sup> (in red) measured in liver. **(F,G)** Flow cytometry dot plots representing CD4<sup>+</sup> Foxp3<sup>+</sup> cells gated on CD4<sup>+</sup> cells in splenocytes. The histogram shows the quantification of the dot plots. **(H)** Flow cytometry dot plots representing CD8<sup>+</sup> PD1<sup>+</sup> LAG3<sup>+</sup> cells gated on CD8<sup>+</sup> cells in splenocytes. **(I)** Flow cytometry dot plots representing the CD8<sup>+</sup> PD1<sup>+</sup> TIM3<sup>+</sup> cells gated on CD8<sup>+</sup> cells in splenocytes. Data were expressed as mean  $\pm$  SD. Statistical analyses were performed by ANOVA (\* =  $p < 0.05$ ,  $n = 3$  per group).

## Supplementary FIGURE 5

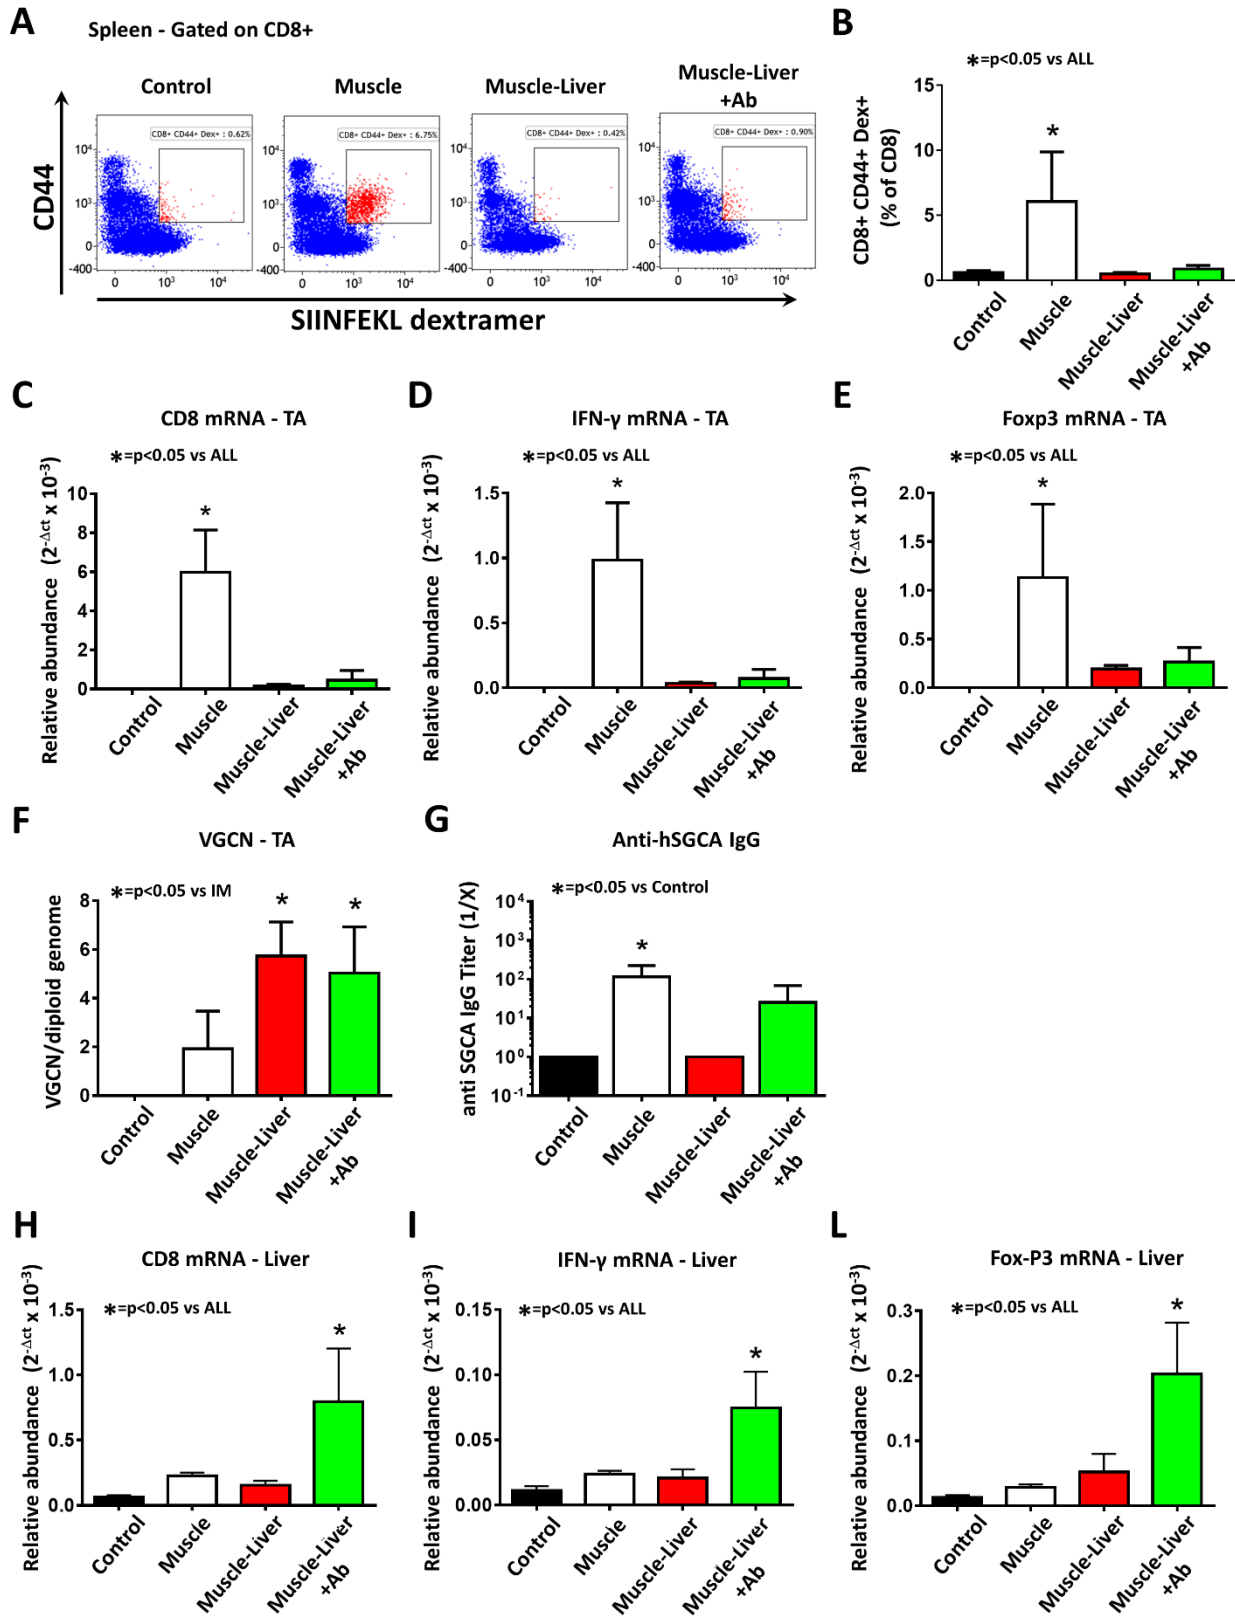

Supplementary Figure 5. (A,B) Flow cytometry dot plots representing CD8+CD44+Dextramer+ cells gated on CD8+ cells in splenocytes. The histogram shows the

quantification of the dot plots. **(C-E)** CD8, IFN $\gamma$  and FoxP3 mRNA measured in *Tibialis anterior* (TA) muscle. **(F)** Vector genome copy number (VGCN) per diploid genome measured in TA muscle. **(G)** Anti-hSGCA IgG titers measured by ELISA using recombinant hSGCA protein. **(H-L)** CD8, IFN $\gamma$  and Foxp3 mRNA measured in liver. Data were expressed as mean  $\pm$  SD. Statistical analyses were performed by ANOVA in all panels except for panel G where a Kruskal-Wallis test was used (\* =  $p < 0.05$ ,  $n = 4$  per group).

## Supplementary FIGURE 6

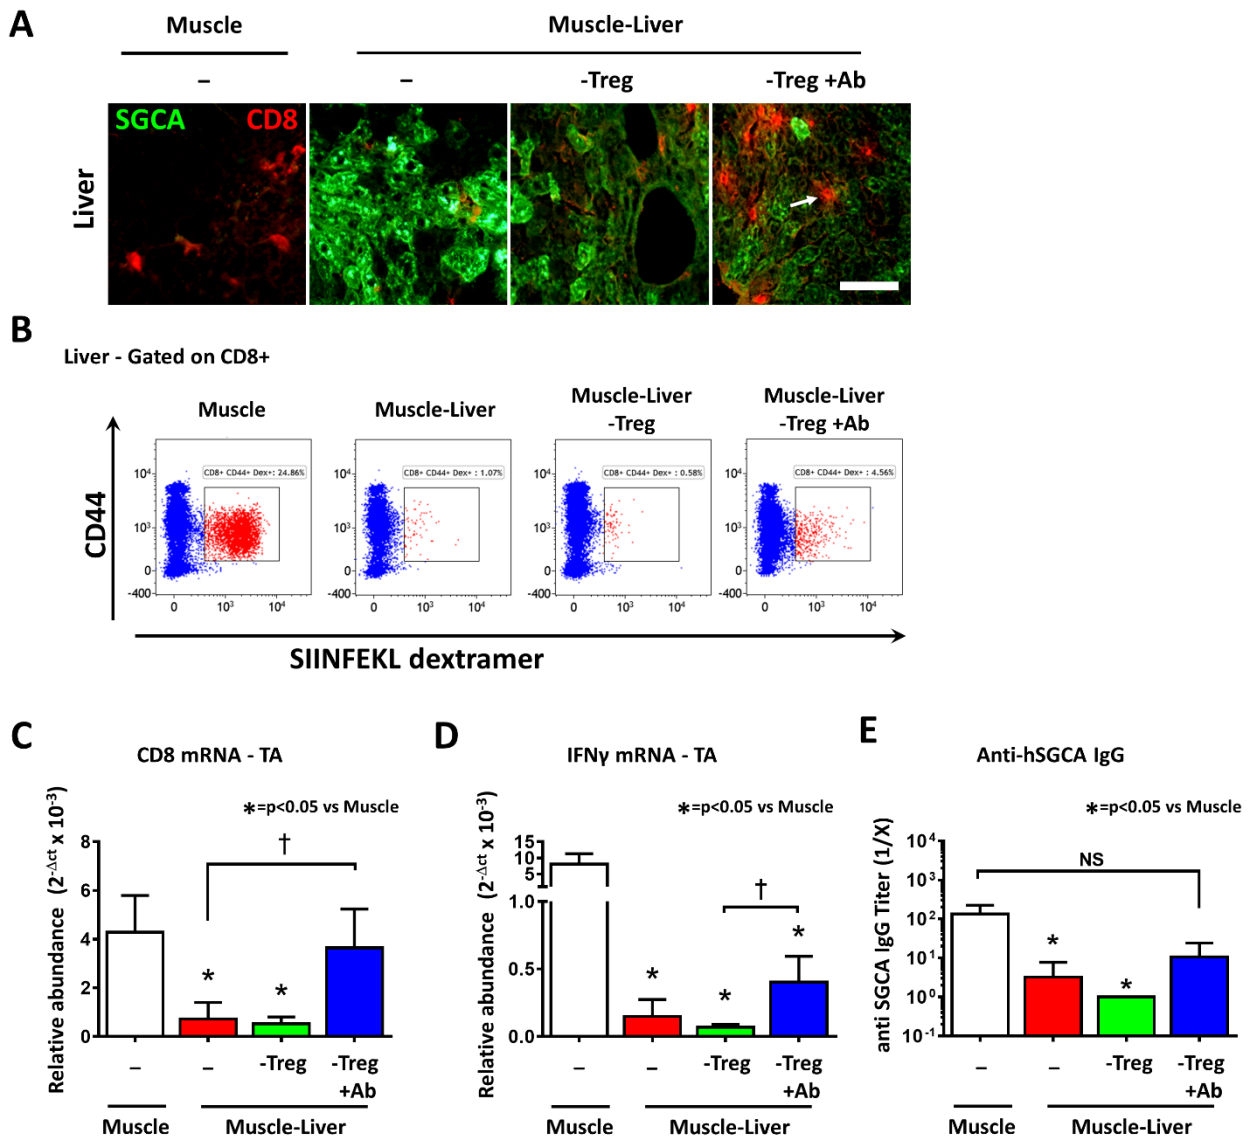

**Supplementary Figure 6.** (A) Immunostaining anti-hSGCA (green), CD8 (red) performed in liver (scale bar = 50  $\mu$ m). White arrow indicates CD8 cell. (B) Flow cytometry dot plots representing liver non-parenchymal CD8+CD44+Dextramer+ cells gated on CD8+ cells. (C, D) CD8 and IFN $\gamma$  mRNA measured in *tibialis anterior*. (E) Anti-hSGCA IgG titers measured by ELISA using recombinant hSGCA protein. Data were expressed as mean  $\pm$  SD. Statistical analyses were performed by ANOVA in all panels except for panel E where a Kruskal-Wallis test was used (\* =  $p < 0.05$ ,  $n = 4$  per group).

## Supplementary FIGURE 7

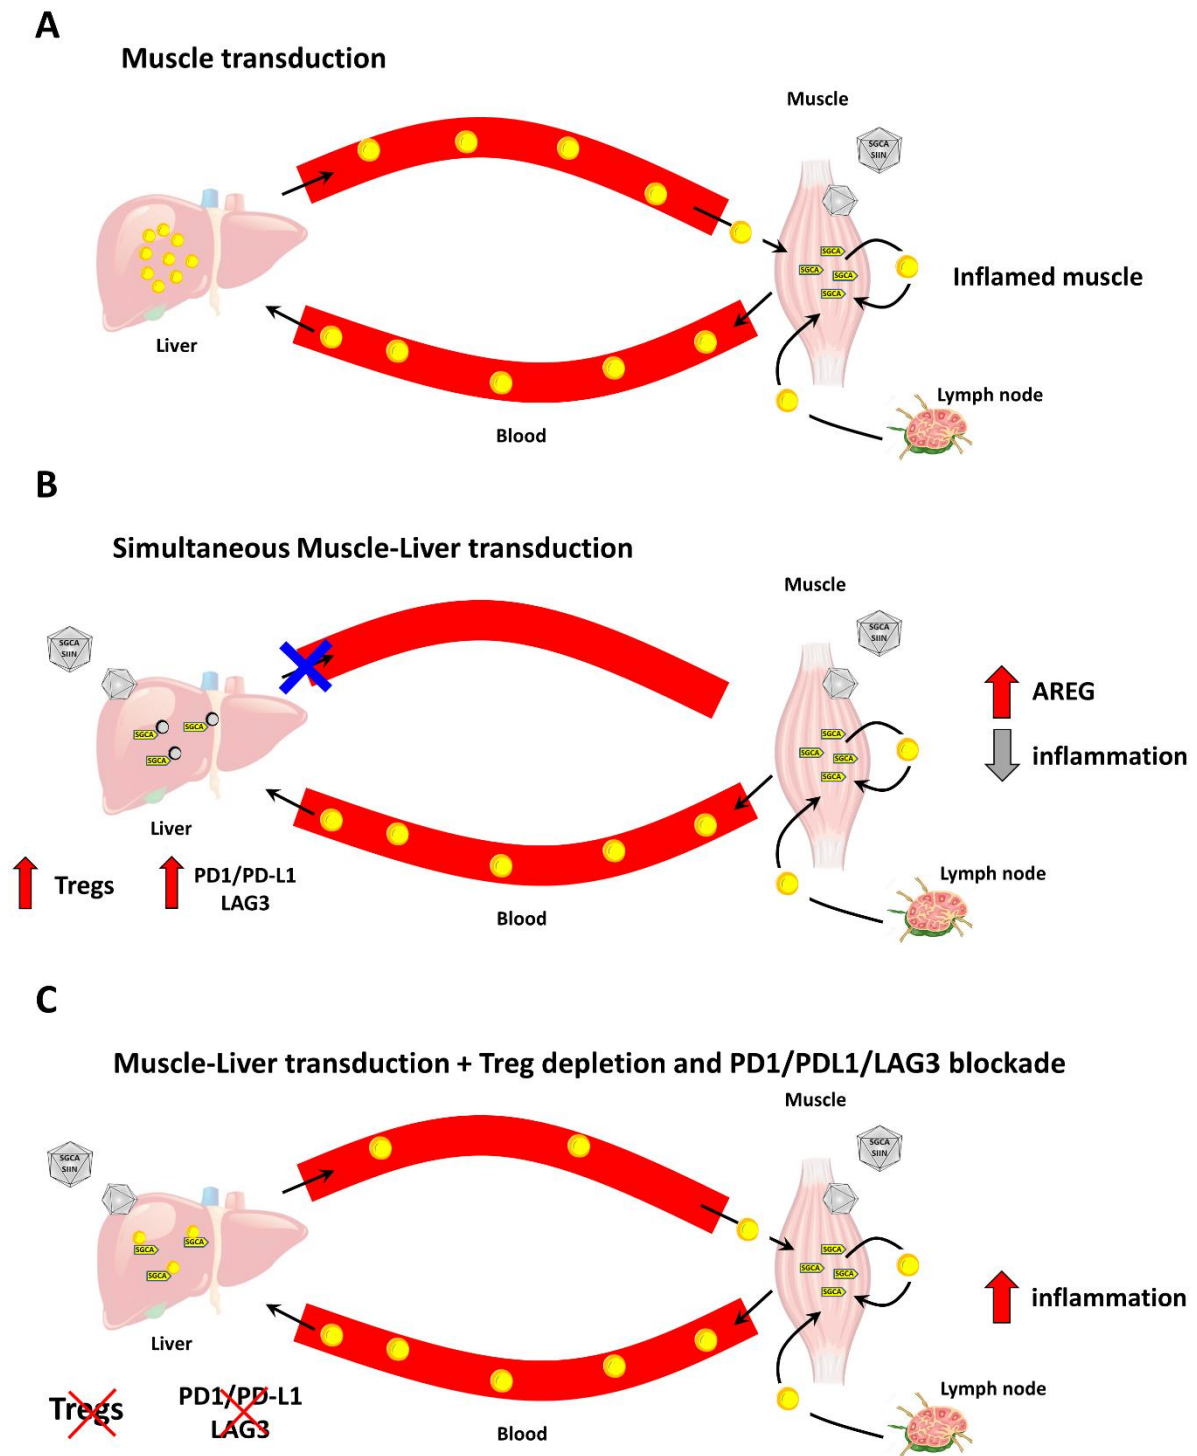

**Supplementary Figure 7.** (A) After intramuscular AAV-mediated delivery of a transgene, antigen presentation occurs directly in muscle or in lymph nodes. Circulating activated T cells

home to the liver with little effect on their activation state. **(B)** In case of simultaneous liver and muscle transduction, activated T cells home to the liver and do not participate in the ongoing immune response in muscle. **(C)** When Tregs depletion is combined with anti PD1/PDL1 and LAG3 inhibition, a partial rescue of the immune response in muscle is observed.
